# Supplementary material
Source: PubMed Central journal article supplement (PMC7738409)
Supplement: NIHMS1642570-supplement-Supporting_information.pdf [file NIHMS1642570-supplement-Supporting_information.pdf]

# Supplementary Data

## SARS-CoV-2 RBD Neutralizing Antibody Induction is Enhanced by Particulate Vaccination

Wei-Chiao Huang, Shiqi Zhou, Xuedan He, Kevin Chiem, Moustafa T. Mabrouk, Ruth H. Nissly, Ian M. Bird, Mike Strauss, Suryaprakash Sambhara, Joaquin Ortega, Elizabeth A. Wohlfert, Luis Martinez-Sobrido, Suresh V. Kuchipudi, Bruce A. Davidson, Jonathan F. Lovell\*

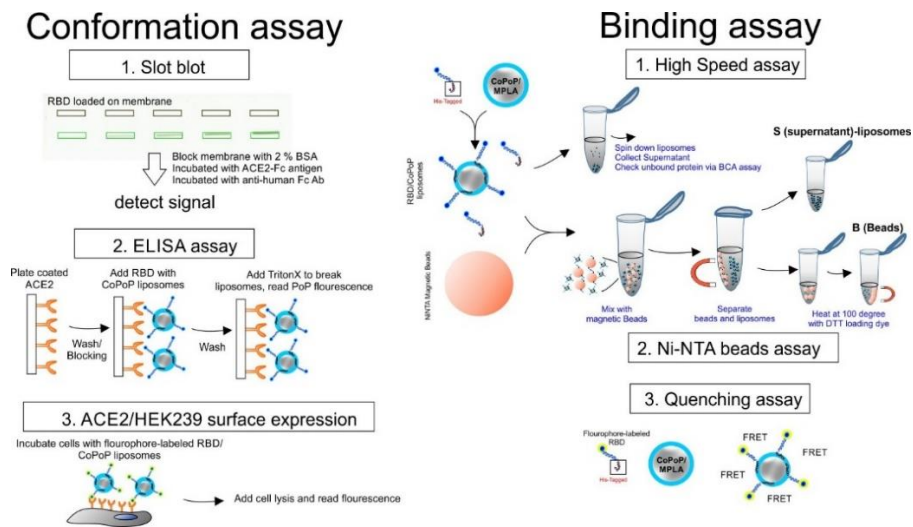

**Supplementary Figure S1. Schematic representation of binding assay and conformation assay of His-tagged Receptor binding domain (RBD) with Cobalt-porphyrin-phospholipid (CoPoP) liposomes.**

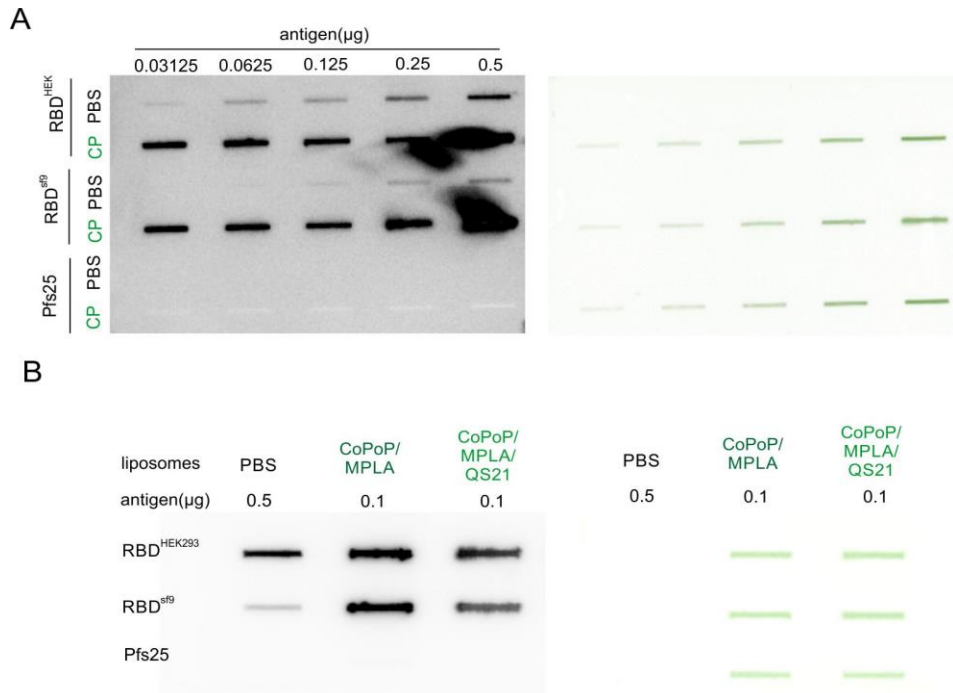

**Supplementary Figure S2. RBD on liposome surface recognizes hACE2 using a slot blot.** (A) Different doses of free receptor binding domain (RBD) or RBD with Cobalt-porphyrin-phospholipid (CoPoP)/monophosphoryl Lipid A (MPLA) liposome on membrane. *Plasmodium falciparum* protein Pfs25 was used as a negative control. (B) Comparison between RBD with CoPoP/MPLA liposomes and RBD with CoPoP/MPLA/QS-21 liposomes.

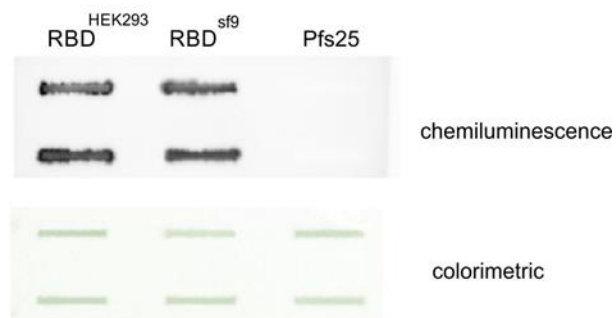

**Supplementary Figure S3. RBD on CoPoP liposome surface is recognized by specific antibodies on Slot Blot.**

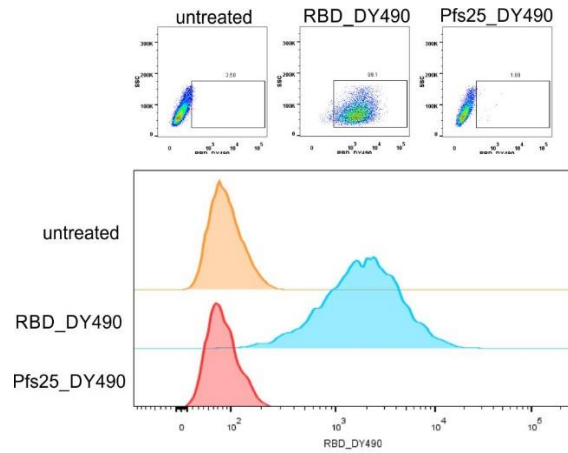

**Supplementary Figure S4. RBD\_DY490 binds to ACE2/HEK293.**

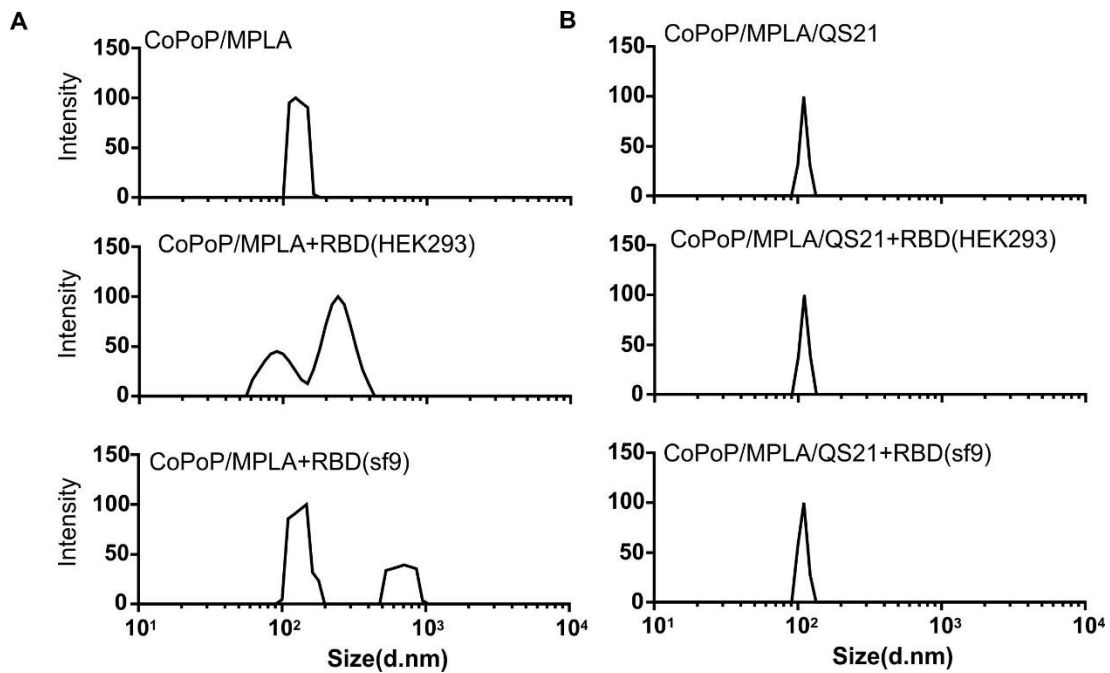

**Supplementary Figure S5. Liposomal distribution was measured using DLS.** (A) CoPoP/MPLA and (B) CoPoP/MPLA/QS-21 liposomes. Liposomes were incubated with RBD(HEK293) or RBD(sf9) for 3 hours at room temperature.

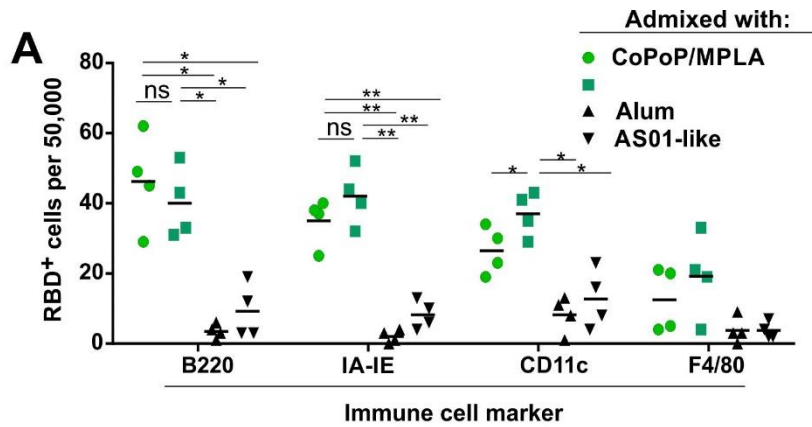

**B**

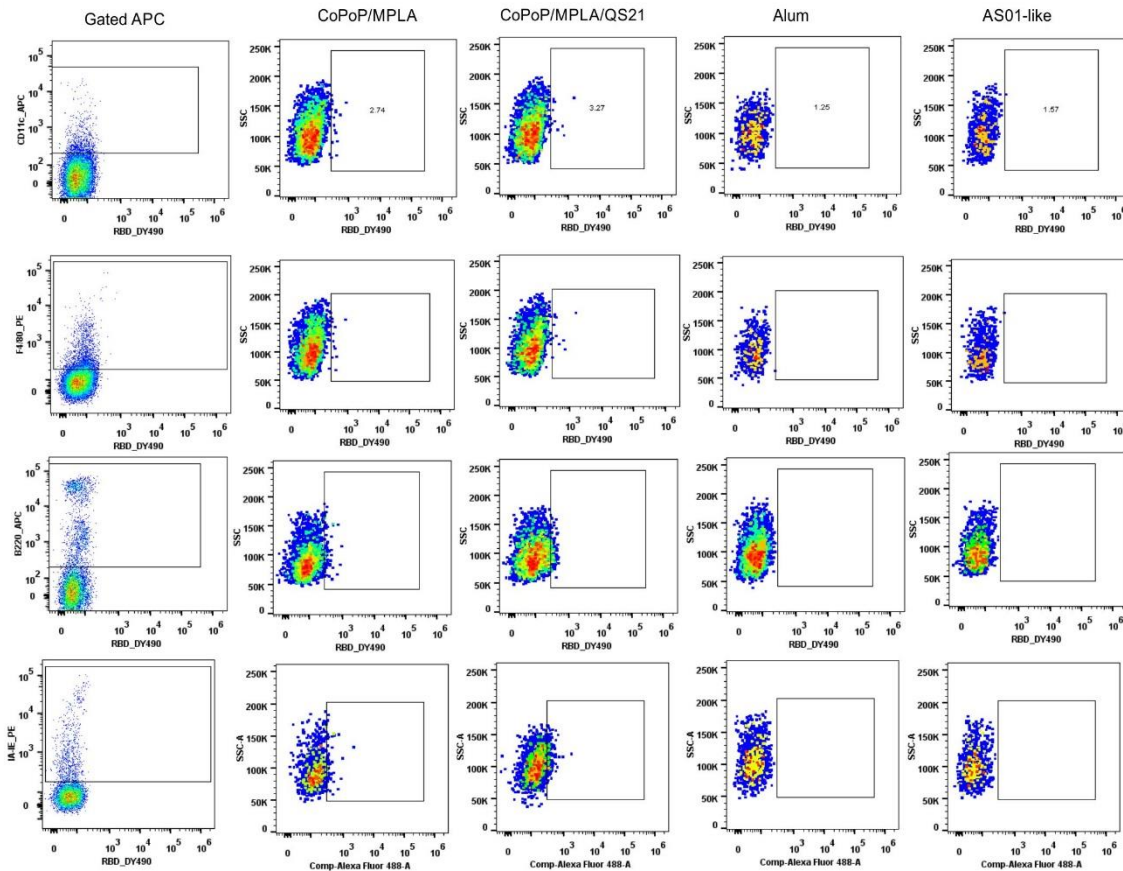

**Supplementary Figure S6. Gating strategy for APC uptake of RBD in lymph nodes.** (A) RBD uptake in immune cells within draining lymph nodes *in vivo* following intramuscular immunization of mice. Labeled RBD uptake was assessed with flow cytometry and co-staining with the indicated surface markers. (B) Cells were gated by SSC-FSC then CD11c-APC, F4/80-PE, B220-APC and IA-IE- positive antigen uptake was assessed by using DY490 labeled RBD. Representative plots are shown from biologically independent experiments with  $n=5$  mice. Bar graphs in A and D show mean  $\pm$  std. dev. for  $n=3$  measurements. Data were analyzed by one-way ANOVA followed by Tukey's post hoc analysis adjusting for multiple comparisons,  $p^* < 0.05$ ,  $p^{**} < 0.01$ .

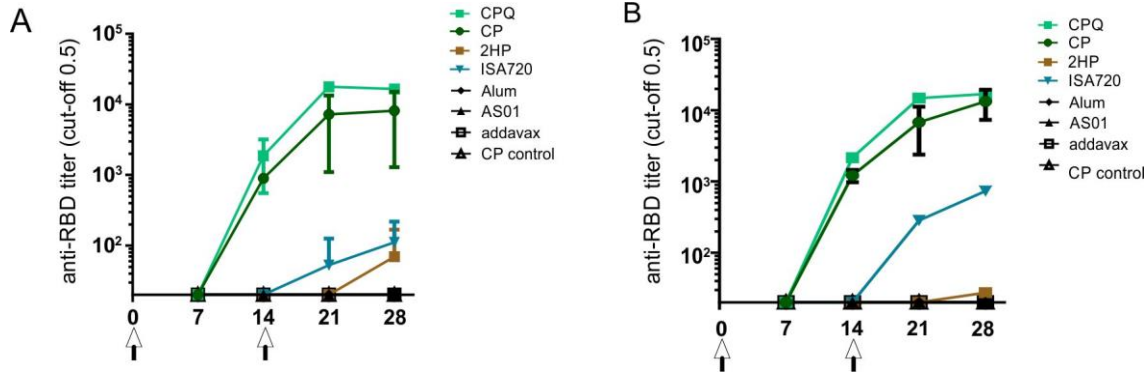

**Supplementary Figure S7. Kinetics of antibody response of the RBD in outbred mice.** Mice were immunized with (A) 100 ng RBD-HEK293 and (B) 100 ng RBD-sf9 at the time points indicated by arrows (n=5 mice per group).

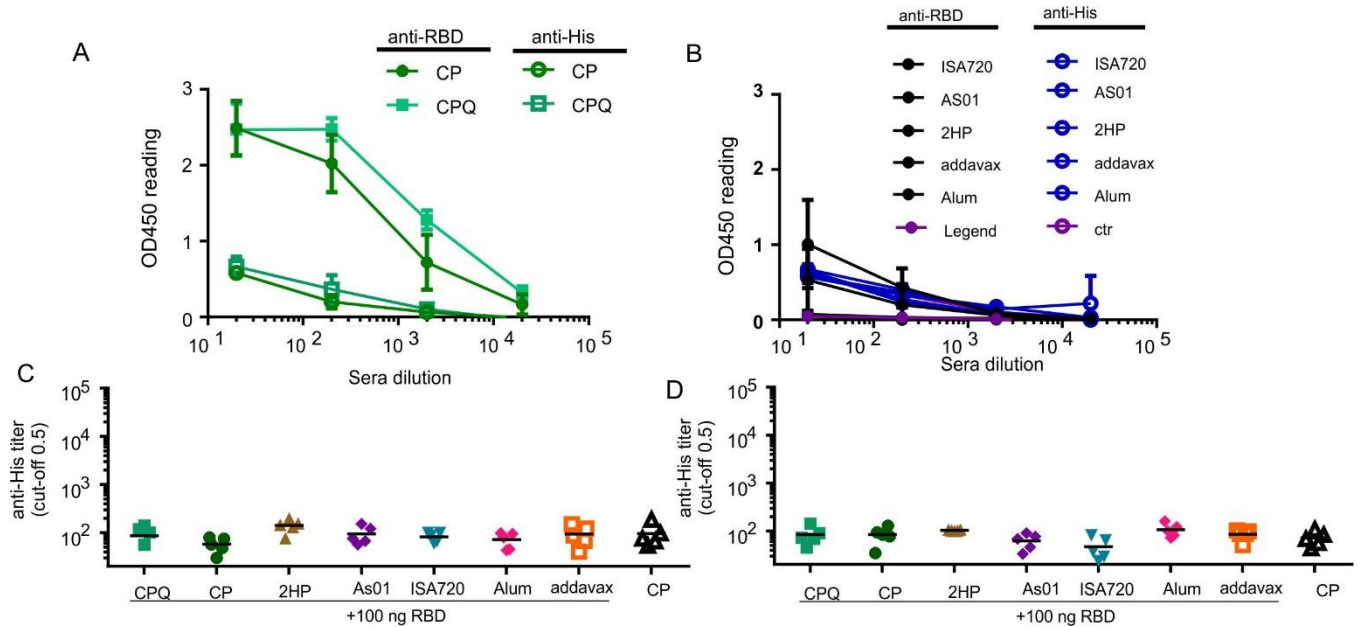

**Supplementary Figure S8. Anti-His-tag titer response of the RBD in outbred mice.** Mice were immunized with (A) 100 ng RBD-HEK293 admixed with CoPoP liposomes, and anti-His-tag were measured by ELISA. (B) 100 ng RBD-HEK293 admixed with indicated adjuvants, including ISA720, AS01-like, PoP liposomes, Addavax, Alum. And anti-His-tag titer was measured. Anti-His-tag titer level was measured in mice immunized with (C) RBD-HEK293 and (D) RBD-sf9. Each group contain n=5 mice.

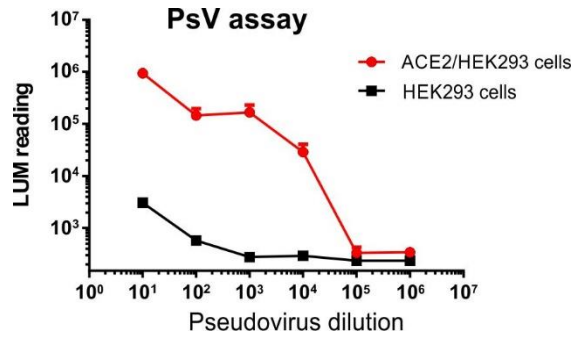

**Supplementary Figure S9. Pseudovirus entry in ACE2/HEK293 and HEK293 cells.**

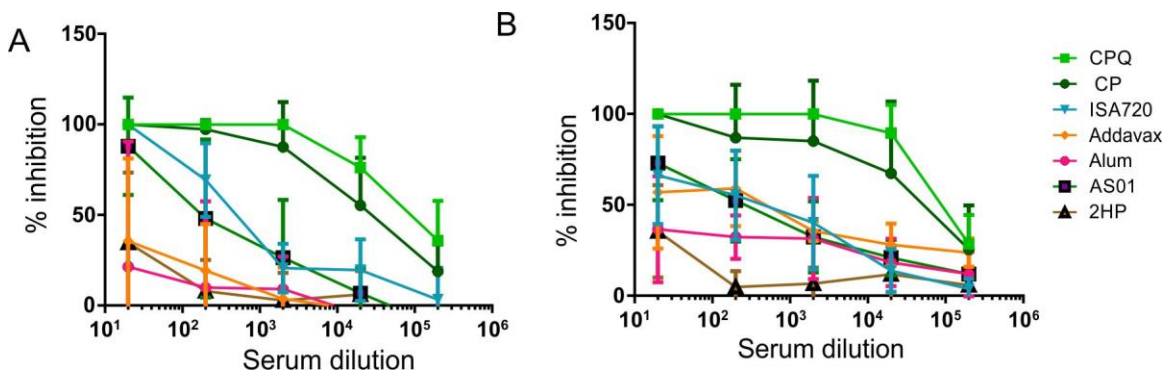

**Supplementary Figure S10. Sera dilution and percentage of inhibition of pseudovirus entry into ACE-HEK293 cells.** Sera from mice immunized with (A) RBD-HEK293 antigen or (B) RBD-sf9 admixed with indicated adjuvant.

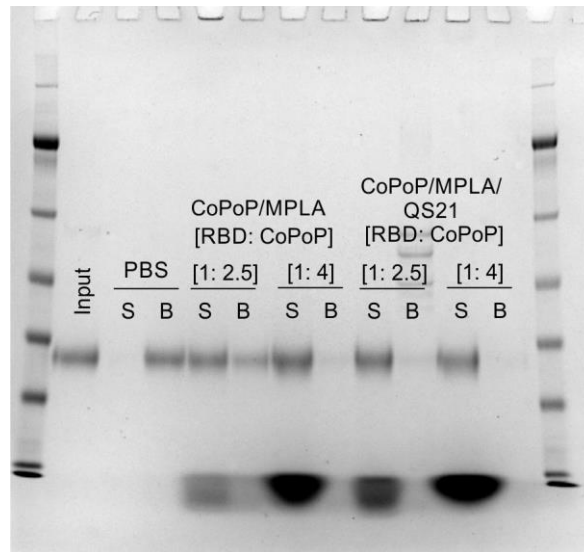

**Supplementary Figure S11. Binding ability of His-tagged RBD to CoPoP liposomes used for rabbit immunization.**

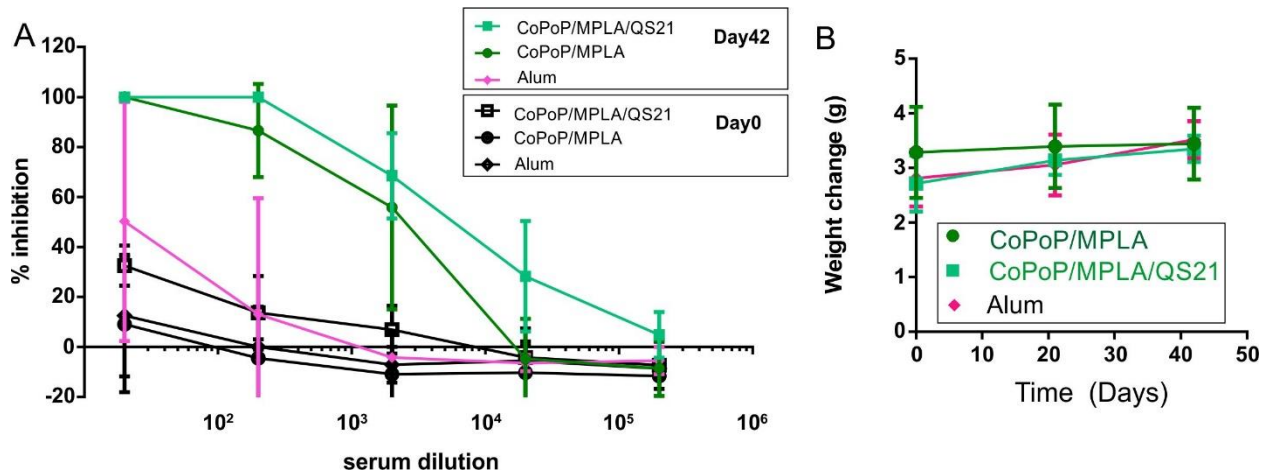

**Supplementary Figure S12. Rabbits were immunized with 20µg of RBD with CoPoP liposomes or Alum on Day0 and Day42.** (A) Immunized sera were incubated with PsV at different dilution factors. A dose dependent inhibition was observed from the final bleeding sera from rabbit immunized with CoPoP liposomes but not the Alum group. (B) Weight of rabbit post-immunization.

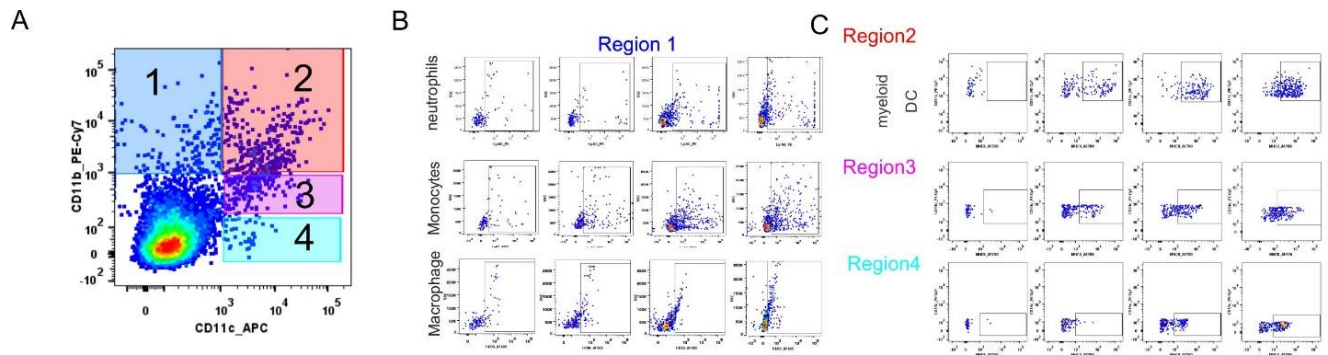

**Supplementary Figure S13. Recruitment of immune cells in the draining lymph node.** (A) Dot plot of lymph node cells collected 48 hours after CoPoP/MPLA liposome injections. x-y axis refers to CD11c-APC and CD11b-PE cy7. (B) Region 1 includes macrophages, infiltrating monocytes, neutrophils and eosinophils. (C) Region 2 represents mDC, Region 3 represents CD11b<sup>low</sup> DC and Region 4 represents CD11b<sup>+</sup> DC.

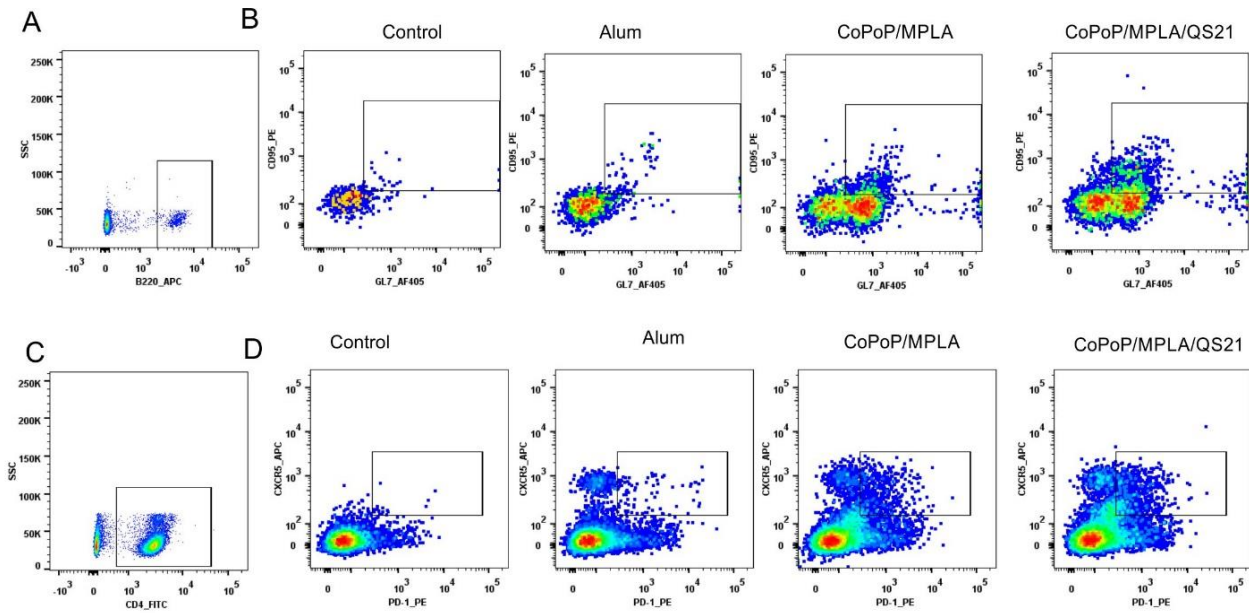

**Supplementary Figure S14. Gating strategy for germinal center (GC) activation.** GC cells ( $GL7^+CD95^+$ ; within the  $B220^+$  cell population) were gated with (A) B220 surface marker to identified B cells, followed by (B) gating  $GL7^+CD95^+$  population. Tfh cells ( $CXCR5^+PD-1^+$ ; within the  $CD4^+$  cell population), cells were gated with (C) CD4 surface marker to identify  $CD4^+$  T cells, followed by (D) gating  $CXCR5^+PD-1^+$ .

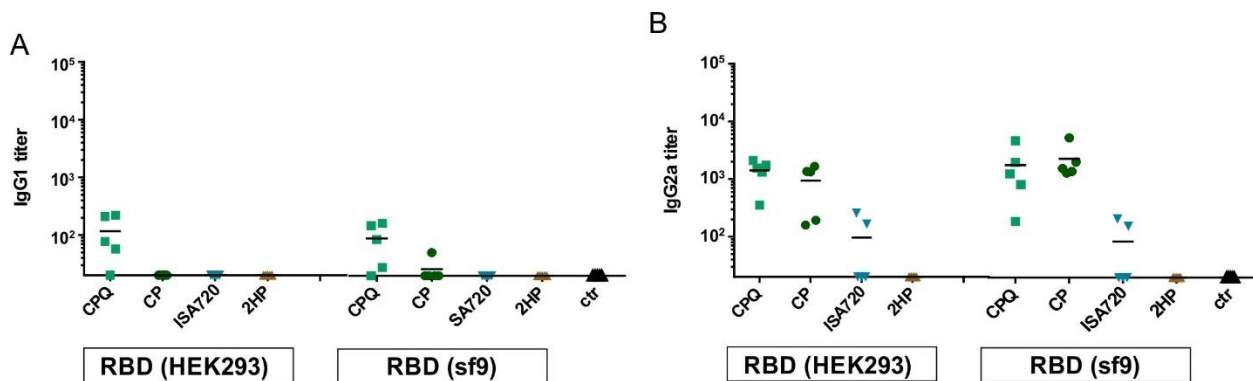

**Supplementary Figure S15. Isotype ratios of CoPoP liposomes, ISA720 and PoP liposomes.** (A) IgG1 and (B) IgG2a.



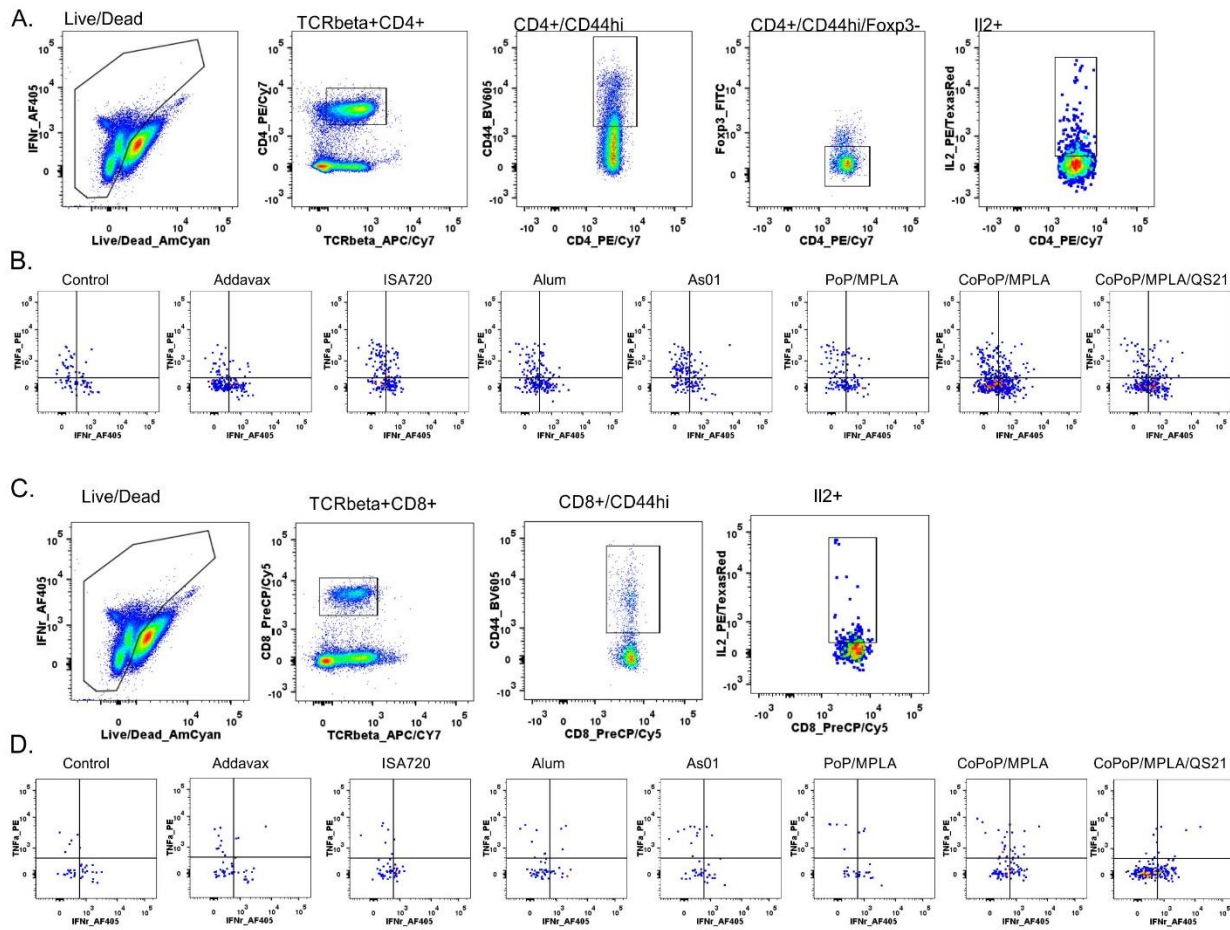

**Supplementary Figure S16. Gating of CD4<sup>+</sup> T cells and CD8<sup>+</sup> T cells.** (A) Live and Dead cells were gated, then TCRbeta<sup>+</sup>CD4<sup>+</sup> T cells were gated, followed by gating CD44<sup>high</sup> population. Later on, Foxp3<sup>+</sup> population were gated, and IL2<sup>+</sup> cells were gated, followed by gating (B) TNF $\alpha$ <sup>+</sup>IFN $\gamma$ <sup>+</sup> cell population. (C) Live and Dead cells were gated, then TCRbeta<sup>+</sup>CD8<sup>+</sup> T cells were gated, followed by gating CD44<sup>high</sup> population. Later on, IL2<sup>+</sup> cells were gated, followed by gating (D) TNF $\alpha$ <sup>+</sup>IFN $\gamma$ <sup>+</sup> cell population.

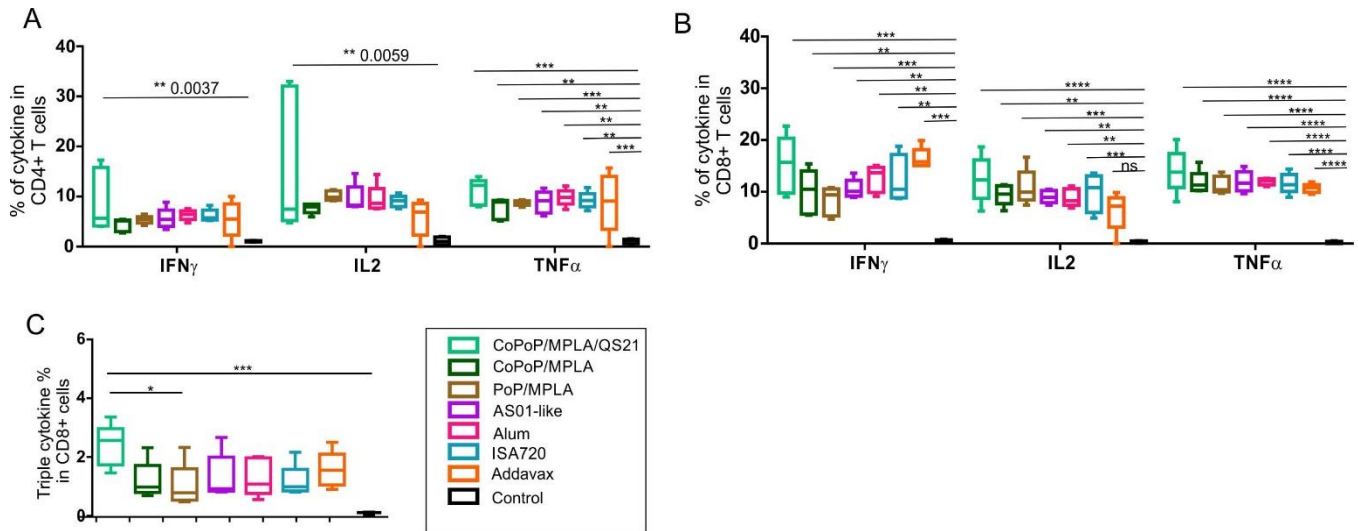

**Supplementary Figure S17. Splenocytes were collected from immunized mice and stimulated with RBD antigen.** Intracellular staining of signal cytokine in (A) CD4<sup>+</sup> T cells and (B) CD8<sup>+</sup> T cells. Triple cytokines in (C) CD8<sup>+</sup> T cells.

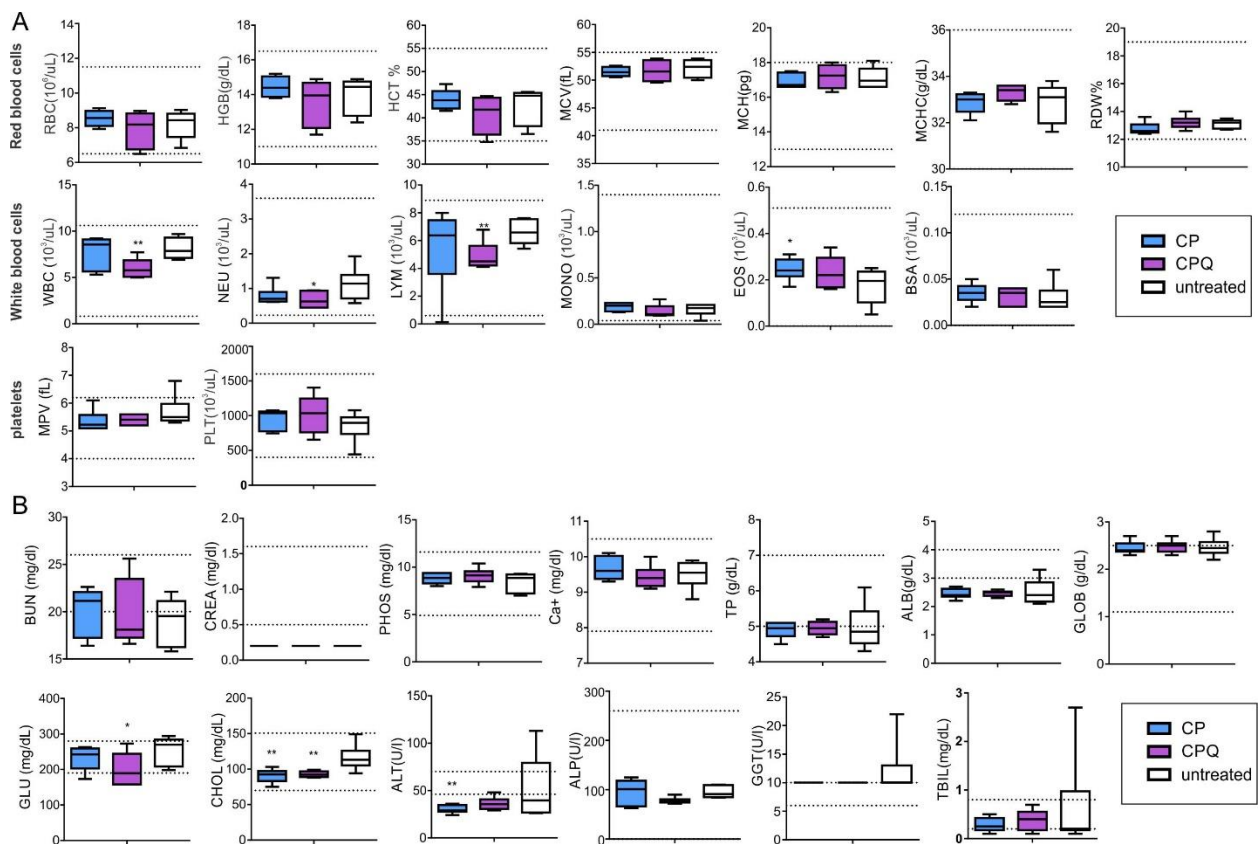

**Supplementary Figure S18. Tolerability of CoPoP liposomes with 1  $\mu$ g His-tagged RBD in CD-1 mice.** Mice were treated with “CoPoP/MPLA+RBD” (1  $\mu$ g Pfs25, 4  $\mu$ g CoPoP and 1.6  $\mu$ g MPLA) or “CoPoP/MPLA/QS-21+RBD” (1  $\mu$ g Pfs25, 4  $\mu$ g CoPoP and 1.6  $\mu$ g MPLA and 1.6  $\mu$ g QS-21). Values

show mean +/- std. dev for n=6 mice per group). A. Complete blood count parameters are as follows for red blood cells: RBC (red blood cell count), HGB (hemoglobin), HCT (hematocrit); MCV (mean cell volume), MCH (mean cell hemoglobin), MCHC (mean cell hemoglobin concentration) and RDW (red cell distribution width). White blood cell parameters are as follows: WBC (white blood cells), NEU (neutrophils), LYM (lymphocytes), MONO (monocytes); EOS (eosinophils), BAS (basophils). Platelet parameters are as follows: PLT (platelet) and MPV (mean platelet volume). B. Serum markers with their general descriptions: Kidney function markers are as follows: BUN (blood urea nitrogen), CREA (creatinine), PHOS (phosphorus), Ca<sup>+</sup> (calcium). Pancreas function markers are as follows: Protein TP (total protein), ALB (albumin), GLOB (globulin) other GLU (glucose), CHOL (cholesterol). Liver function markers are as follows: ALT (alanine aminotransferase), ALP (alkaline phosphatase), ALB (albumin), TBIL (total bilirubin). The line in the box represent the median and the whiskers issuing from the box extend to the group minimum and maximum value. The length of the box represents the interquartile range. Unpaired two-sided student's T-test were used for statistical analysis, \* represents the comparison between CoPoP liposomes to control with p<0.1 and \*\* represents the comparison between CoPoP liposomes to control with p<0.05.

**Table S1. Comparison of complete blood count (CBC) parameters between untreated mice and mice treated with CoPoP liposome in CD-1 mice.** Mice were treated with “CoPoP/MPLA+RBD” (1 µg RBD, 4 µg CoPoP and 1.6 µg MPLA) or “CoPoP/MPLA/QS-21+RBD” (1 µg Pfs25, 4 µg CoPoP and 1.6 µg MPLA and 1.6 µg QS-21). Values show mean +/- standard deviation for mice (n=6 per group). CBC parameters are as follows for red blood cells: RBC (red blood cell count), HGB (hemoglobin), HCT (hematocrit); MCV (mean cell volume); MCH (mean cell hemoglobin), MCHC (mean cell hemoglobin concentration) and RDW (red cell distribution width). White blood cell parameters are as follows: WBC (white blood cells), NEU (neutrophils), LYM (lymphocytes), MONO (monocytes), EOS (eosinophils), BAS (basophils). Platelets parameters are as follows: PLT (platelet) and MPV (mean platelet volume).

| CBC                          | Control                | CoPoP/MPLA             | CoPoP/MPLA/QS-21         | Normal         |
|------------------------------|------------------------|------------------------|--------------------------|----------------|
|                              | Mean ± SD [range]      | Mean ± SD [range]      | Mean ± SD [range]        | range          |
| RBC (10 <sup>6</sup> /uL)    | 8.19±0.80 [6.84-9.02]  | 8.54±0.47 [7.93-9.13]  | 7.91 ±1.04 [6.49-8.96]   | 6.5 - 11.5     |
| HGB (g/dL)                   | 13.97±1.05 [12.4-14.9] | 14.45±0.58 [13.8-15.2] | 13.55 ±1.31 [11.7-14.9]  | 11 - 16.5      |
| HCT %                        | 42.63±3.94 [36.5-45.6] | 43.98±2.18 [41.5-47.3] | 40.70 ±4.02 [34.8-44.7]  | 35 – 55        |
| MCV (fL)                     | 52.13±1.58 [50-53.9]   | 51.52±0.85 [50.5-52.6] | 51.67 ±1.92 [49.6-53.9]  | 41 – 55        |
| MCH (pg)                     | 17.12±0.58 [16.6-18.1] | 16.92±0.42[16.6-17.5]  | 17.20 ±0.70 [16.3-18]    | 13.0 – 18      |
| MCHC(g/dL)                   | 32.85±0.83 [31.6-33.8] | 32.87±.45 [32.1-33.3]  | 33.30 ±0.33[32.8-33.6]   | 30 – 36        |
| RDW%                         | 13.12±0.31 [12.7-13.5] | 12.77±.44 [12.4-13.6]  | 13.21 ±0.46 [12.6-14]    | 12 – 19        |
| WBC<br>(10 <sup>3</sup> /uL) | 8.11±1.15 [6.90-9.68]  | 7.74 ±1.77 [5.31-9.07] | 5.98 ±1.02 [4.98-6.56]** | 0.80 -<br>10.6 |

|                               |                       |                          |                            |                |
|-------------------------------|-----------------------|--------------------------|----------------------------|----------------|
| NEU (10 <sup>3</sup> /uL)     | 1.13±0.47 [0.58-1.93] | 0.79 ±0.26 [0.61-1.31]   | 0.67 ±0.22 [0.45-0.95] *   | 0.23 - 3.6     |
| LYM (10 <sup>3</sup> /uL)     | 6.62±0.88 [5.42-7.62] | 5.49±2.85 [0.14-7.99]    | 4.89 ±1.01 [4.11-6.78]**   | 0.6 - 8.9      |
| MONO<br>(10 <sup>3</sup> /uL) | 0.16±0.06 [0.04-0.21] | 0.19±0.05 [0.13-0.23]    | 0.14 ±0.07 [0.09-0.27]     | 0.04 - 1.4     |
| EOS (10 <sup>3</sup> /uL)     | 0.17±0.08 [0.05-0.25] | 0.25±0.05 [0.17-0.31] *  | 0.23 ±0.07 [0.16-0.34]     | 0.00 -<br>0.51 |
| BAS (10 <sup>3</sup> /uL)     | 0.03±0.02[0.02-0.05]  | 0.04±0.01 [0.02-0.04]    | 0.03 ±0.01 [0.02-0.06]     | 0.00 -<br>0.12 |
| MPV (fL)                      | 5.7±0.56 [5.30-6.80]  | 5.36±0.38 [5.1-6.1]      | 5.4 ±0.18 [5.2-5.6]        | 4-6.2          |
| PLT (10 <sup>3</sup> /uL)     | 849±215.92 [444-1079] | 956.17±149.11 [746-1075] | 1020.67 ±276.96 [656-1405] | 400 -<br>1600  |

\* indicates values that differ significantly (p< 0.1) between control and CoPoP groups based on a two-sided student's T-test.

\*\* indicates values that differ significantly (p<0.05) between control and CoPoP groups based on a two-sided student's T-test.

**Table S2. Comparison of Blood Chemistry Panel between untreated or CoPoP liposome-treated CD-1 mice.** Mice were treated with “CoPoP/MPLA+RBD” (1 µg RBD, 4 µg CoPoP and 1.6 µg MPLA). Values show mean +/- standard deviation for mice (n=6 per group). Serum markers with their general description are as follows: Kidney function markers are as follows: BUN (blood urea nitrogen), CREA (creatinine), PHOS (phosphorus), Ca<sup>+</sup> (calcium). Pancreas function markers are as follows: Protein TP (total protein), ALB (albumin), GLOB (globulin) other GLU (glucose), CHOL (cholesterol). Liver function markers are as follows: ALT (alanine aminotransferase), ALP (alkaline phosphatase), ALB (albumin), TBIL (total bilirubin).

|                | Control                | CoPoP/MPLA             | CoPoP/MPLA/QS-21        | Normal range |
|----------------|------------------------|------------------------|-------------------------|--------------|
|                | Mean ± SD [range]      | Mean ± SD [range]      | Mean ± SD [range]       |              |
| BUN (mg/dl)    | 19.03±2.49 [15.8-22.1] | 20.12±2.54 [16.4-22.6] | 19.9±3.63 [16.6-25.6]   | 20.0 - 26.0  |
| CREA (mg/dL)   | 0.2±0.0 [0.2-0.2]      | 0.2±0.0 [0.2-0.2]      | 0.2±0.0 [0.2-0.2]       | 0.5 - 1.6    |
| PHOS (mg/dL)   | 8.42±1.01 [7-9.3]      | 8.82±0.55 [8-9.4]      | 9.1±0.82 [7.9-10.4]     | 4.9-11.6     |
| Ca+ (mg/dL)    | 9.50±0.39 [8.8-9.9]    | 9.67±0.34 [9.3-10.1]   | 9.43±.31 [9.1-10]       | 7.9 - 10.5   |
| TP (g/dL)      | 4.98±0.62 [4.3-6.1]    | 4.90±.23 [4.5-5.1]     | 4.95±0.19 [4.7-5.2]     | 5.0 - 7.0    |
| ALB (g/dL)     | 2.52±.44 [2.1-3.3]     | 2.45±.18 [2.2-2.7]     | 2.47±0.1 [2.3-2.6]      | 3.0 - 4.0    |
| GLOB (g/dL)    | 2.47±0.20 [2.2-2.8]    | 2.45±.14 [2.3-2.7]     | 2.48±0.13 [2.3-2.7]     | 1.1-2.5      |
| GLU (mg/dl)    | 221.5±111.38 [198-294] | 232±34.19 [173-263]    | 200.5±45.44 [158-273] * | 190 - 280    |
| CHOL (mg/dl)   | 116.00±18.31 [94-149]  | 90.67±9.48 [75-103]**  | 92.67±4.23 [88-99]**    | 69.6-150.81  |
| ALT(GPT) (U/I) | 52.17±33.87 [26-113]   | 30.17±4.26 [24-36]     | 36.17±6.68 [29-48]      | 46-70        |
| ALP (U/I)      | 95.00±12.03 [84-110]   | 95.50±25.57 [63-125]   | 77.67±6.28 [72-90]**    | 0 - 260      |
| GGT (U/I)      | 12.00±4.9[10-22]       | 10.00±.0 [10-10]       | 10.00±0 [10-10]         | 6.0 - 10.0   |
| TBIL (mg/dL)   | 0.63±1.02 [0.1-2.7]    | 0.28±0.15 [0.1-0.5]    | 0.38±.22 [0.1-0.7]      | 0.2 - 0.8    |

\* indicates values that differ significantly (p< 0.1) between control and CoPoP groups based on a two-sided student’s T-test.

\*\* indicates values that differ significantly (p<0.05) between control and CoPoP groups based on a two-sided student’s T-test.

**Table S3 Summary of murine immunization data**

| Sample          | anti-RBD titer | Pseudovirus | ACE2-RBD % inhibition | Live virus titer |
|-----------------|----------------|-------------|-----------------------|------------------|
| CP-RBD-HEK      | 1920           | 13649       | 99.5209               | >=1280           |
| CP-RBD-HEK      | 6990           | 830         | 98.2914               | >=1280           |
| CP-RBD-HEK      | 1780           | 31530       | 98.0564               | >=1280           |
| CP-RBD-HEK      | 12500          | 22257       | 98.2101               | >=1280           |
| CP-RBD-HEK      | 17600          | 13884       | 92.985                | >=1280           |
| CPQ-RBD-HEK     | 15900          | 21718       | 99.6203               | >=1280           |
| CPQ-RBD-HEK     | 13500          | 26627       | 99.8282               | >=1280           |
| CPQ-RBD-HEK     | 17500          | 72583       | 96.6552               | >=1280           |
| CPQ-RBD-HEK     | 18100          | 20301       | 100.099               | >=1280           |
| CPQ-RBD-HEK     | 17600          | 12906       | 99.3401               | >=1280           |
| AS01-RBD-HEK    | 20             | 20          | 26.8148               | 80               |
| AS01-RBD-HEK    | 20             | 406.5       | 23.7778               | 10               |
| AS01-RBD-HEK    | 20             | 20          | 30.0556               | 160              |
| AS01-RBD-HEK    | 20             | 223.9       | 28.8056               | 320              |
| AS01-RBD-HEK    | 20             | 284.8       | 27.9259               | 80               |
| I720-RBD-HEK    | 280            | 363.7       | 27.537                | --               |
| I720-RBD-HEK    | 20             | 942.9       | 24.0278               | --               |
| I720-RBD-HEK    | 20             | 45.75       | 34.0926               | --               |
| I720-RBD-HEK    | 125            | 75.7        | 32.3981               | --               |
| I720-RBD-HEK    | 110            | 270.5       | 21.4907               | --               |
| Alum-RBD-HEK    | 20             | 1015        | 32.6296               | 0                |
| Alum-RBD-HEK    | 20             | 20          | 34.9074               | 0                |
| Alum-RBD-HEK    | 20             | 20          | 38.4352               | 10               |
| Alum-RBD-HEK    | 20             | 20          | 22.6204               | 0                |
| Alum-RBD-HEK    | 20             | 20          | 30.5093               | 10               |
| Addavax-RBD-HEK | 20             | 20          | 24.713                | --               |
| Addavax-RBD-HEK | 244            | 20          | 21.7685               | --               |
| Addavax-RBD-HEK | 20             | 20          | 21.3241               | --               |
| Addavax-RBD-HEK | 20             | 119.5       | 29.7407               | --               |
| Addavax-RBD-HEK | 44.2           | 212         | 27.5278               | --               |
| 2HP-RBD-HEK     | 20             | 20          | 33.6296               | --               |
| 2HP-RBD-HEK     | 20             | 20          | 29.0648               | --               |
| 2HP-RBD-HEK     | 20             | 20          | 31                    | --               |
| 2HP-RBD-HEK     | 20             | 21.4        | 31.7315               | --               |
| 2HP-RBD-HEK     | 20             | 201.9       | 26.0833               | --               |
| CP-RBD-sf9      | 96.0043        | 21100       | 108625                | >=1280           |
| CP-RBD-sf9      | 99.5751        | 14500       | 74189                 | >=1280           |
| CP-RBD-sf9      | 99.4124        | 5350        | 32079                 | >=1280           |

|                 |         |       |        |        |
|-----------------|---------|-------|--------|--------|
| CP-RBD-sf9      | 68.2155 | 9730  | 180    | 640    |
| CP-RBD-sf9      | 97.3423 | 15900 | 17916  | 160    |
| CPQ-RBD-sf9     | 92.09   | 19100 | 21711  | >=1280 |
| CPQ-RBD-sf9     | 97.7943 | 16600 | 22481  | >=1280 |
| CPQ-RBD-sf9     | 98.9604 | 19600 | 109680 | >=1280 |
| CPQ-RBD-sf9     | 98.5717 | 15200 | 167340 | >=1280 |
| CPQ-RBD-sf9     | 99.0689 | 14100 | 167683 | >=1280 |
| AS01-RBD-sf9    | 25.0949 | 20    | 330.4  | --     |
| AS01-RBD-sf9    | 25.0678 | 20    | 27.82  | --     |
| AS01-RBD-sf9    | 31.3596 | 20    | 20     | --     |
| AS01-RBD-sf9    | 31.7754 | 20    | 212.4  | --     |
| AS01-RBD-sf9    | 30.4466 | 20    | 20     | --     |
| ISA720-RBD-sf9  | 27.8883 | 1760  | 20     | --     |
| ISA720-RBD-sf9  | 25.3932 | 116   | 1051   | --     |
| ISA720-RBD-sf9  | 36.1689 | 1740  | 272    | --     |
| ISA720-RBD-sf9  | 33.3484 | 20    | 619.5  | --     |
| ISA720-RBD-sf9  | 24.3536 | 20    | 25.36  | --     |
| Alum-RBD-sf9    | 17.6365 | 20    | 2254   | 40     |
| Alum-RBD-sf9    | 27.6365 | 20    | 20     | 80     |
| Alum-RBD-sf9    | 20.5603 | 20    | 20     | 160    |
| Alum-RBD-sf9    | 40      | 20    | 20     | 0      |
| Alum-RBD-sf9    | 13.4339 | 20    | 602.2  | 160    |
| Addavax-RBD-sf9 | 23.6422 | 56.7  | 13269  | --     |
| Addavax-RBD-sf9 | 20.1724 | 20    | 49.87  | --     |
| Addavax-RBD-sf9 | 28.2256 | 20    | 20     | --     |
| Addavax-RBD-sf9 | 21.7026 | 20    | 20     | --     |
| Addavax-RBD-sf9 | 18.8865 | 20    | 20     | --     |
| 2HP-RBD-sf9     | 30.9619 | 20    | 20     | --     |
| 2HP-RBD-sf9     | 28.0419 | 20    | 100    | --     |
| 2HP-RBD-sf9     | 36.1237 | 20    | 237.6  | --     |
| 2HP-RBD-sf9     | 18.9929 | 20    | 20     | --     |
| 2HP-RBD-sf9     | 29.7053 | 20    | 20     | --     |
| CP control      | 24.1457 | 20    | 20     | --     |
| CP control      | 19.6167 | 20    | 20     | --     |
| CP control      | 22.5909 | 20    | 20     | --     |
| CP control      | 14.5995 | 20    | 20     | --     |
| CP control      | 16.3442 | 20    | 20     | --     |

**Table S4: Summary of rabbit immunization data.**

|              | anti-RBD titer | Pseudovirus | ACE2-RBD % inhibition | Live virus titer |
|--------------|----------------|-------------|-----------------------|------------------|
| CPQ-RBD-HEK  | 6170           | 4113.987    | 89.5679               | >=1280           |
| CPQ-RBD-HEK  | 11600          | 2366.538    | 91.9906               | >=1280           |
| CPQ-RBD-HEK  | 1480           | 1202.183    | 97.2067               | >=1280           |
| CPQ-RBD-HEK  | 19800          | 138010.9    | 97.9931               | >=1280           |
| CP-RBD-HEK   | 15200          | 288.3075    | 40.6708               | >=1280           |
| CP-RBD-HEK   | 18600          | 3764.018    | 76.8487               | 160              |
| CP-RBD-HEK   | 36000          | 2423.331    | 21.9309               | 320              |
| CP-RBD-HEK   | 25500          | 5224.041    | 98.6169               | 80               |
| Alum-RBD-sf9 | 20             | 20          | 3.38998               | 160              |
| Alum-RBD-sf9 | 171            | 20          | 0                     | 320              |
| Alum-RBD-sf9 | 20             | 530.0465    | 0                     | 320              |
| Alum-RBD-sf9 | 690            | 20          | 5.52341               | 640              |
